# Supplementary material for: Amine-responsive cellulose-based ratiometric fluorescent materials for real-time and visual detection of shrimp and crab freshness
Source: PubMed Central journal article supplement (PMC6377604; doi:10.1038/s41467-019-08675-3), 2019-02-15
Supplement: 41467_2019_8675_MOESM2_ESM.pdf [file 41467_2019_8675_MOESM2_ESM.pdf]

## **Supplementary Information**

**Amine-responsive cellulose-based ratiometric fluorescent materials for real-time and visual detection of shrimp and crab freshness**

***Jia et al.***

## Supplementary Figures

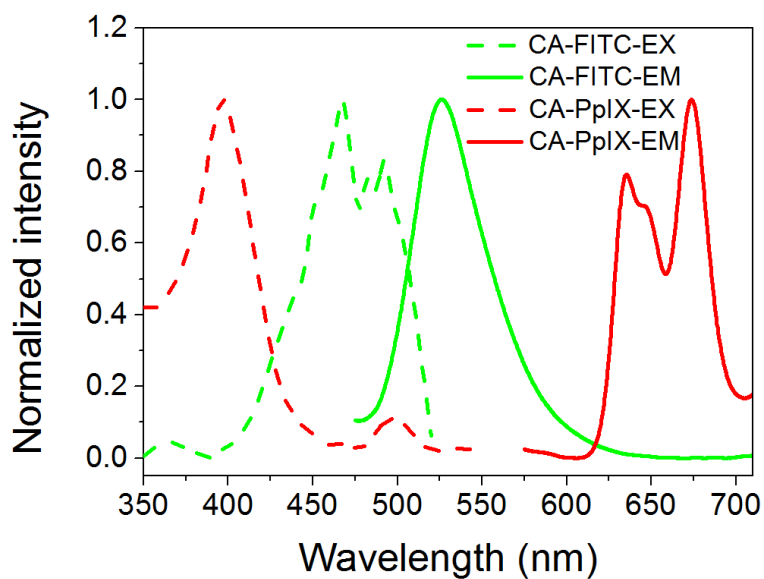

**Supplementary Figure 1.** Normalized excitation and emission spectra of CA-FITC and CA-PpIX.

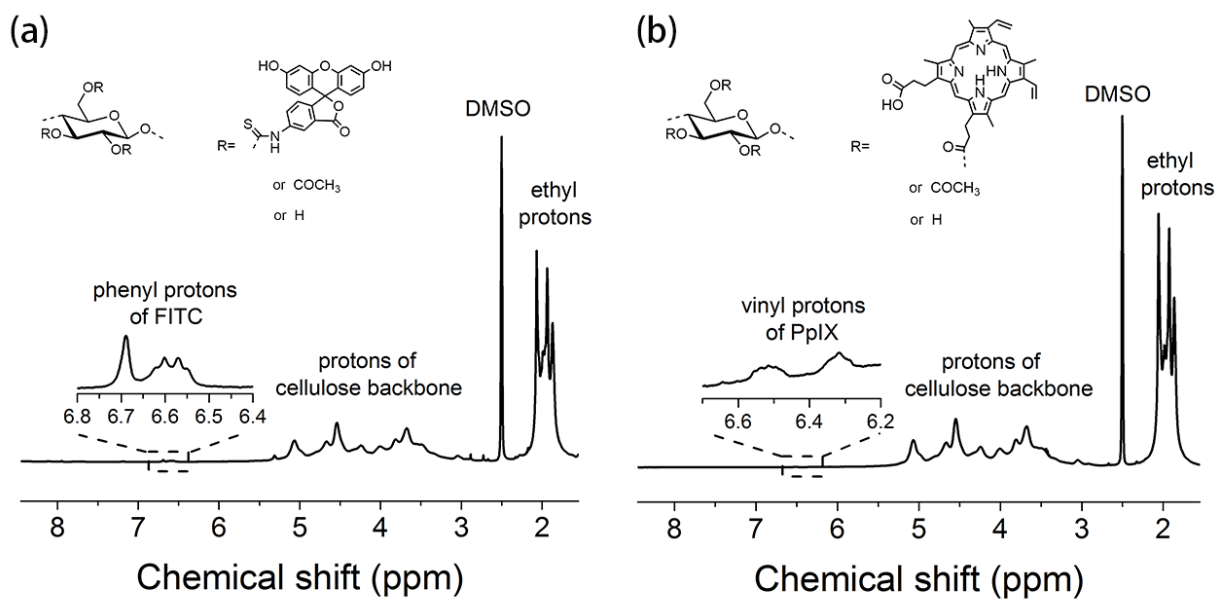

**Supplementary Figure 2.** <sup>1</sup>H-NMR spectra of (a) CA-FITC and (b) CA-PpIX.

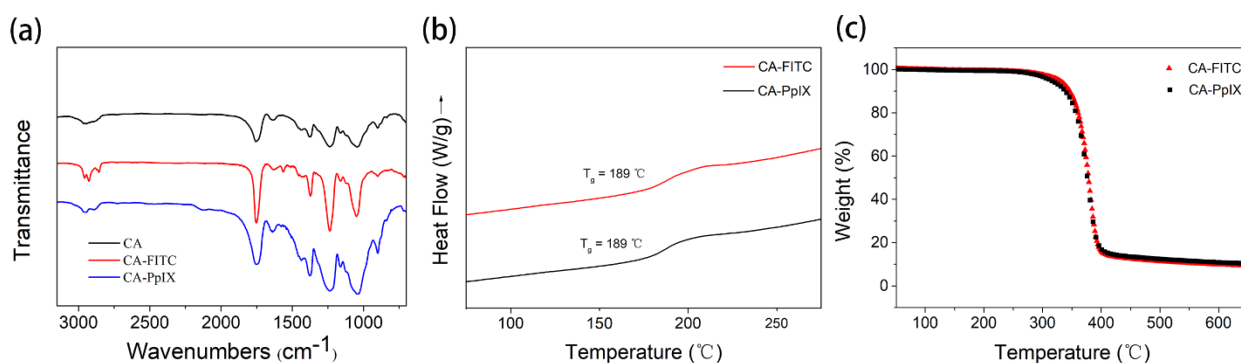

**Supplementary Figure 3.** Characterization of CA-FITC and CA-PpIX. (a) FTIR spectra of CA, CA-FITC and CA-PpIX. (b) DSC curves of CA-FITC and CA-PpIX. (c) TGA curves of CA-FITC and CA-PpIX.

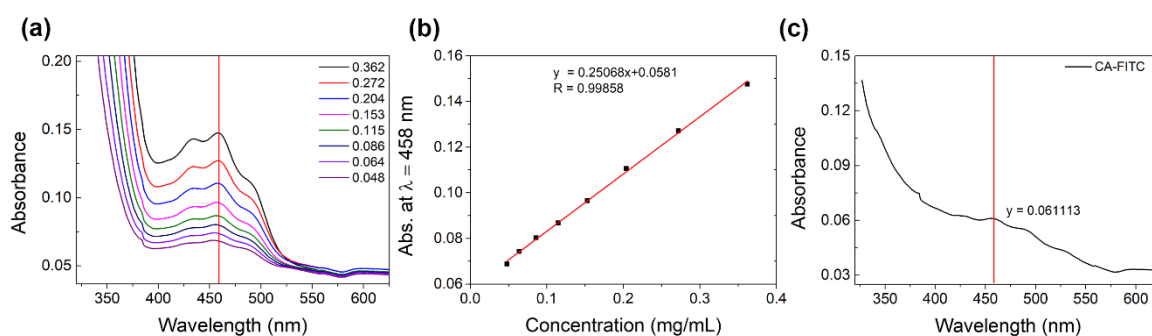

**Supplementary Figure 4.** Detection of the degree of substitution (DS) of CA-FITC. (a) UV-vis spectra of FITC in DMF with different concentrations (mg/mL). (b) Calibration curve of FITC concentration with respect to the absorbance at 458 nm. (c) UV-vis spectrum of CA-FITC.

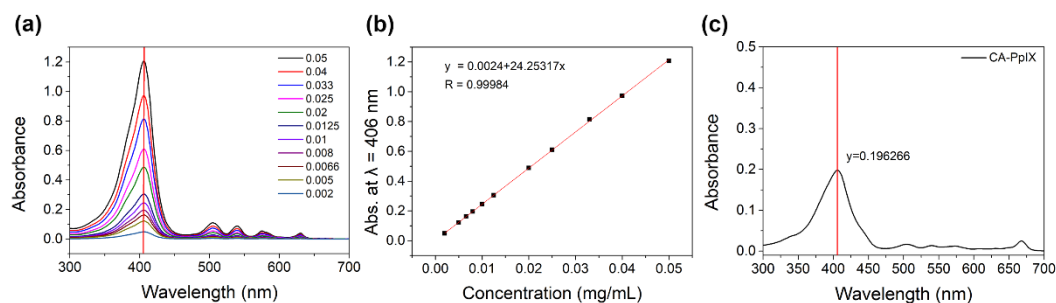

**Supplementary Figure 5.** Detection of the DS of CA-PpIX. (a) UV-vis spectra of PpIX in DMF with different concentrations (mg/mL). (b) Calibration curve of PpIX concentration with respect to the absorbance at 406 nm. (c) UV-vis spectrum of CA-PpIX.

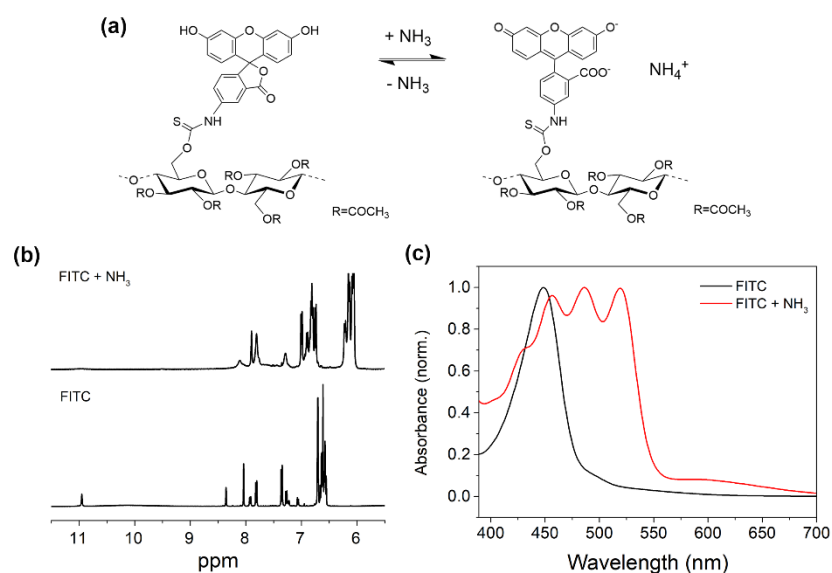

**Supplementary Figure 6.** Amine-response mechanism of CA-FITC. (a) Schematic illustration of the molecular structure change of CA-FITC upon reacting with  $\text{NH}_3$ . (b)  $^1\text{H-NMR}$  spectra of FITC and FITC upon reacting with  $\text{NH}_3$ . (c) UV-vis spectrum of FITC and FITC upon reacting with  $\text{NH}_3$ .

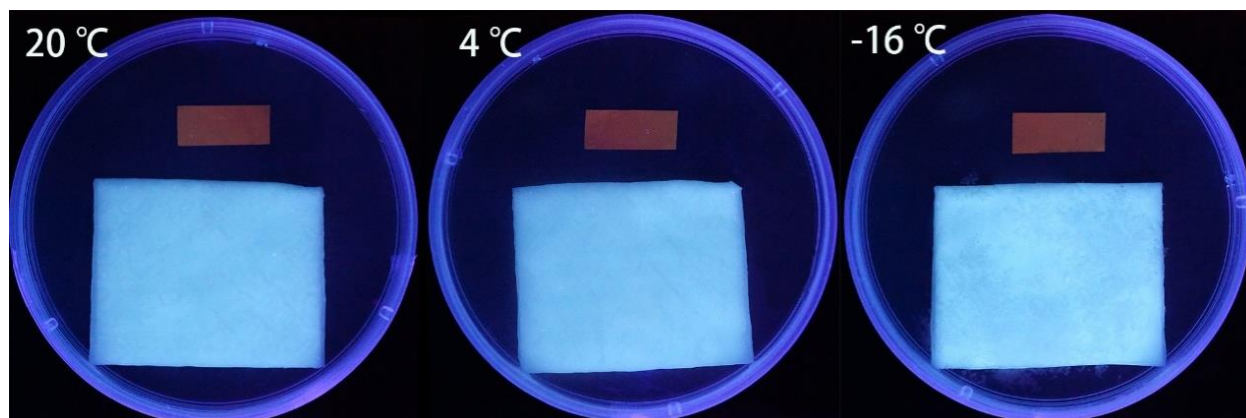

**Supplementary Figure 7.** Images of the electrospun membranes with wet tissues stored at different temperature for 5 days, and no fluorescence color change occurred.

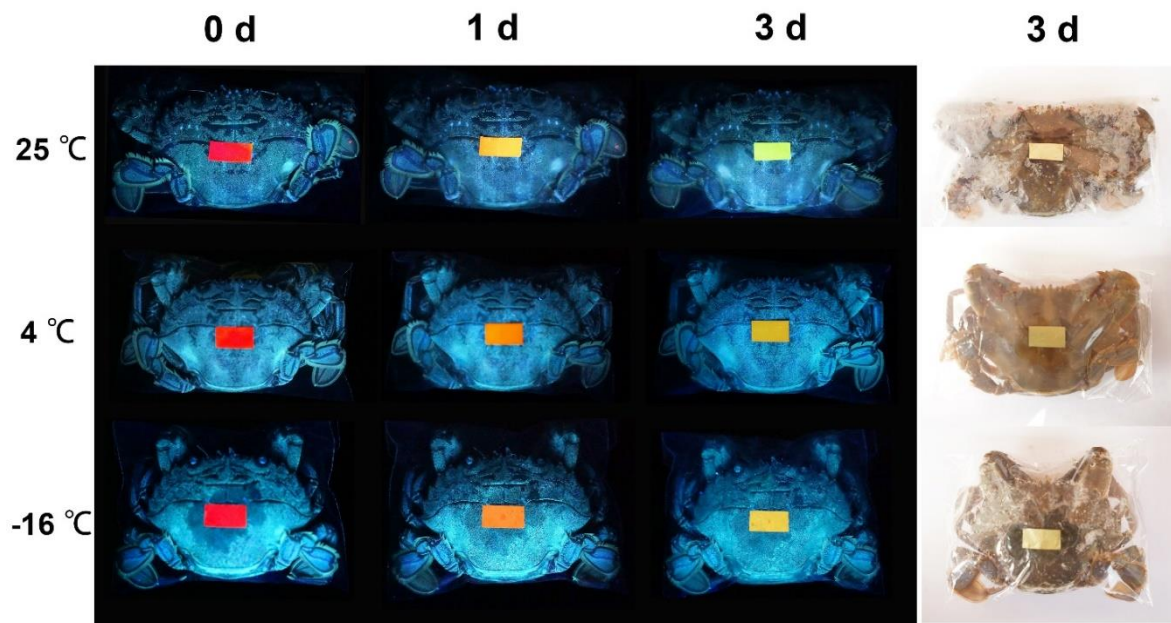

**Supplementary Figure 8.** Images of the cellulose-based ratiometric fluorescent material with a red initial fluorescence as a smart trademark for monitoring the freshness of crabs stored at different conditions.

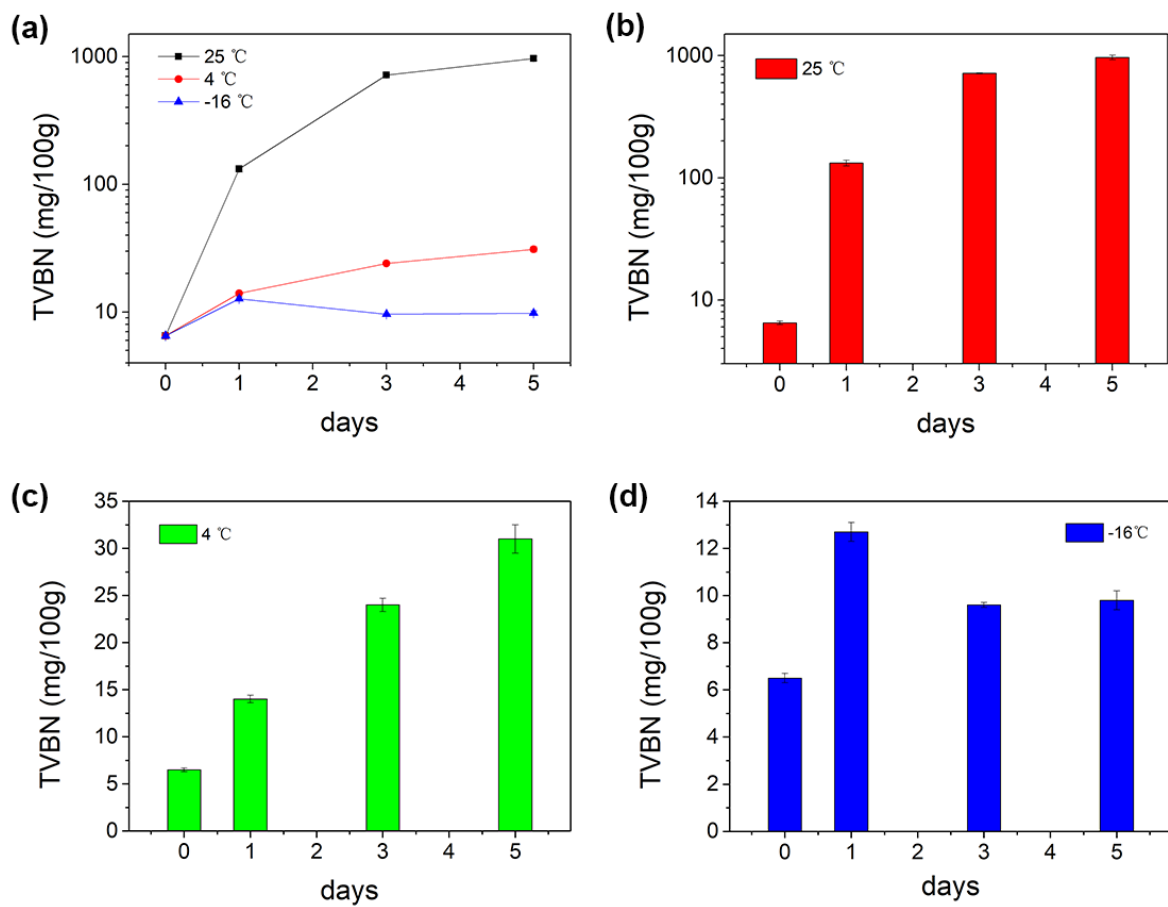

**Supplementary Figure 9.** (a) The total volatile basic nitrogen (TVBN) in shrimps stored at 25 °C, 4 °C and -16 °C for different days; (b-d) The TVBN content in shrimps stored at 25 °C, 4 °C and -16 °C respectively. Error bar represents the standard deviation, n = 3.

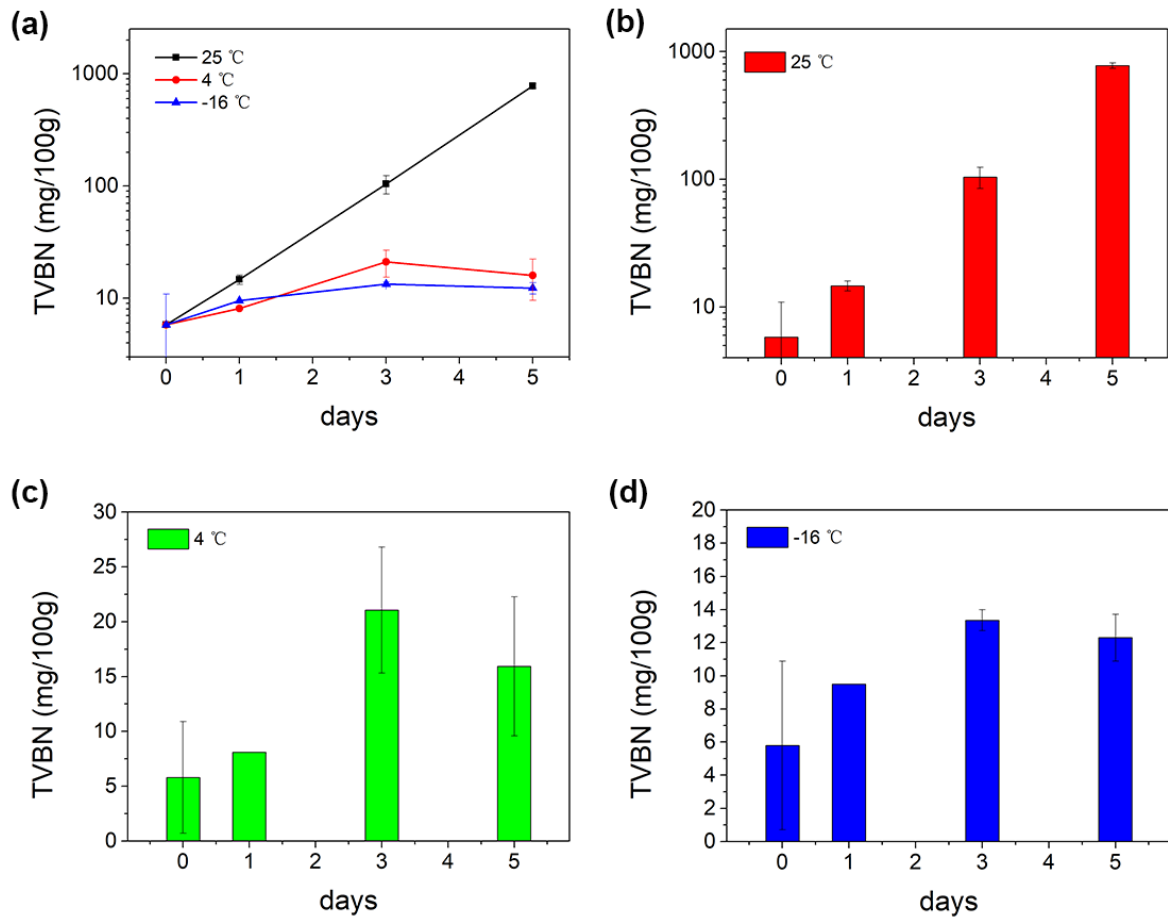

**Supplementary Figure 10.** (a) The total volatile basic nitrogen (TVBN) in crabs stored at 25 °C, 4 °C and -16 °C for different days; (b-d) The TVBN content in crabs stored at 25 °C, 4 °C and -16 °C respectively. Error bar represents the standard deviation, n = 3.

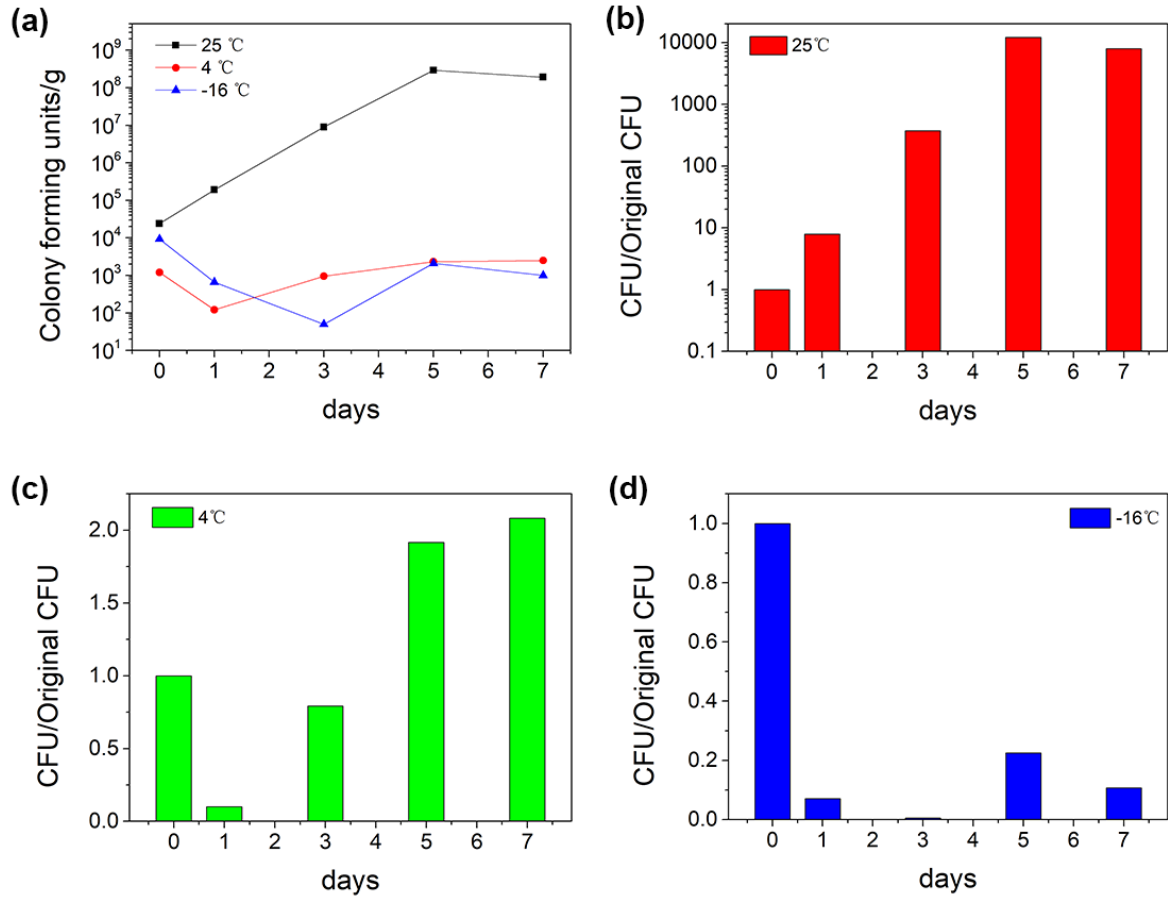

**Supplementary Figure 11.** (a) Colony forming units (CFU) of bacteria in shrimps stored at 25 °C, 4 °C and -16 °C for different days; (b-d) The ratio of CFU and original CFU (fresh shrimps, 0 days) of bacteria in shrimps stored at 25 °C, 4 °C and -16 °C for different days.

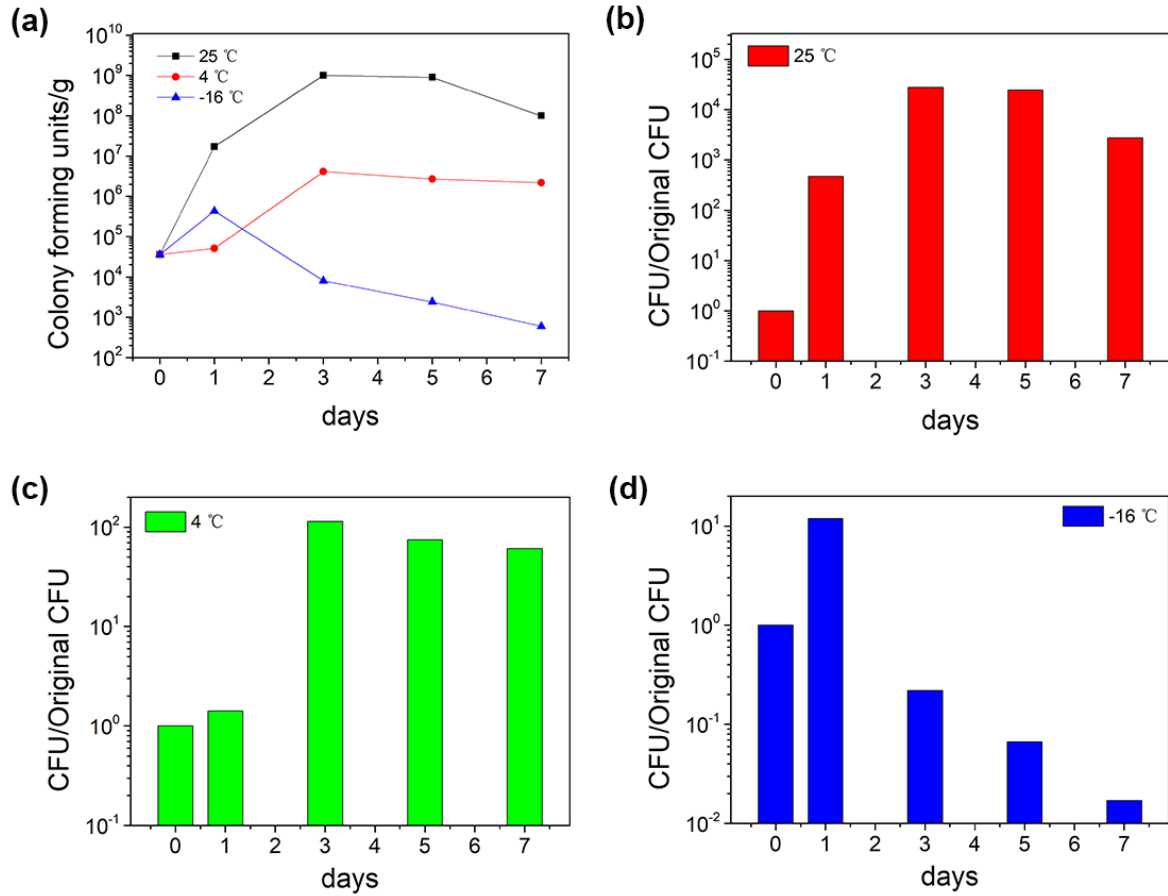

**Supplementary Figure 12.** (a) Colony forming units (CFU) of bacteria in crabs stored at 25 °C, 4 °C and -16 °C for different days; (b-d) The ratio of CFU and original CFU (fresh crabs, 0 days) of bacteria in crabs stored at 25 °C, 4 °C and -16 °C for different days.
