# Supplementary material for: Amine-responsive cellulose-based ratiometric fluorescent materials for real-time and visual detection of shrimp and crab freshness
Source: PubMed Central journal article supplement (PMC6377604; doi:10.1038/s41467-019-08675-3), 2019-02-15
Supplement: 41467_2019_8675_MOESM3_ESM.pdf [file 41467_2019_8675_MOESM3_ESM.pdf]

## **Description of Additional Supplementary Files**

File Name: Supplementary Movie 1

Description: The response behavior of fluorescent Cellulose materials.
